# Supplementary material for: Convergent Evolution of Sodium Ion Selectivity in Metazoan Neuronal Signaling
Source: PubMed Central journal article supplement — Cell Rep. 2012 Aug 30;2(2):242–8. doi: 10.1016/j.celrep.2012.06.016 (PMC3809514; doi:10.1016/j.celrep.2012.06.016), 2012-08-30
Supplement: mmc1.pdf [file mmc1.pdf]

**Table S1. Ion Channels Used in the Phylogenetic Analysis, Related to Figure 4**

| Organism                                            | Phylum          | Channel                | Alternative names | GenBank accession           |
|-----------------------------------------------------|-----------------|------------------------|-------------------|-----------------------------|
| <i>Aiptasia pallida</i> (sea anemone)               | Cnidaria        | ApNa <sub>v</sub> 1    |                   | AAB96953                    |
| <i>Anopheles gambiae</i> (African malaria mosquito) | Arthropoda      | AgCa <sub>v</sub> 1    | -                 | ABQ88369                    |
| <i>Aplysia californica</i> (sea hare)               | Mollusca        | AcNa <sub>v</sub> 1    | SCAP1             | AAC47457                    |
| <i>Blatella germanica</i> (German cockroach)        | Arthropoda      | BgNa <sub>v</sub> 1    | Para              | AAC47483                    |
|                                                     |                 | BgNa <sub>v</sub> 2    | BSC1              | AAK01090                    |
| <i>Branchiostoma floridae</i> (lancelet)            | Cephalochordata | BfNa <sub>v</sub> 1    | -                 | HQ877456                    |
|                                                     |                 | BfNa <sub>v</sub> 2    | -                 | HQ877455                    |
| <i>Cancer borealis</i> (Jonah crab)                 | Arthropoda      | CbNa <sub>v</sub> 1    | -                 | ABL10360                    |
| <i>Capitella teleta</i> (polychete worm)            | Annelida        | CtNa <sub>v</sub> 1    | -                 | None, JGI protein ID 210954 |
|                                                     |                 | CtNa <sub>v</sub> 2    | -                 | None, JGI protein ID 134859 |
| <i>Clytia hemisphaerica</i> (hydrozoan jellyfish)   | Cnidaria        | ChNa <sub>v</sub> 2.1  | -                 | JQ066821                    |
|                                                     |                 | Ch Na <sub>v</sub> 2.5 | -                 | JQ066822                    |
| <i>Cyanea capillata</i> (lion mane's jellyfish)     | Cnidaria        | CcNa <sub>v</sub> 2.5  | -                 | AAA75572                    |
|                                                     |                 | CcCa <sub>v</sub> 1    | -                 | AAC63050                    |
| <i>Danio rerio</i> (zebrafish)                      | Chordata        | DrNa <sub>v</sub> 1.6  | -                 | AAG18440                    |
| <i>Drosophila melanogaster</i> (fruit fly)          | Arthropoda      | DmNa <sub>v</sub> 1    | Para              | AAB59195                    |
|                                                     |                 | DmNa <sub>v</sub> 2    | DSC1, 60E         | Q9W0Y8                      |
|                                                     |                 | DmCa <sub>v</sub> 1    | -                 | AAA81883                    |
| <i>Halocynthia roretzi</i> (ascidian)               | Chordata        | HrNa <sub>v</sub> 1    | TuNa1             | BAA04133                    |
|                                                     |                 | HrNa <sub>v</sub> 2    | TuNa2             | BAA95896                    |
|                                                     |                 | HrCa <sub>v</sub> 1    | -                 | BAA34927                    |
| <i>Homo sapiens</i> (human)                         | Chordata        | hNa <sub>v</sub> 1.1   | SCN1A, Brain      | P35498                      |

|                                          |              |                       |                                                  |          |
|------------------------------------------|--------------|-----------------------|--------------------------------------------------|----------|
|                                          |              |                       | type I channel                                   |          |
|                                          |              | hNa <sub>v</sub> 1.2  | SCN2A, Brain<br>type II channel                  | Q99250   |
|                                          |              | hNa <sub>v</sub> 1.3  | SCN3A, Brain<br>type III<br>channel              | Q9NY46   |
|                                          |              | hNa <sub>v</sub> 1.4  | SCN4A,<br>Skeletal<br>muscle type IV<br>channel  | AAO83647 |
|                                          |              | hNa <sub>v</sub> 1.5  | SCN5A,<br>Cardiac<br>muscle type V               | Q14524   |
|                                          |              | hNa <sub>v</sub> 1.6  | SCN8A                                            | Q9UQD0   |
|                                          |              | hNa <sub>v</sub> 1.7  | SCN9A,<br>Peripheral<br>sodium<br>channel 1, PN1 | Q15858   |
|                                          |              | hNa <sub>v</sub> 1.8  | SCN10A                                           | Q9Y5Y9   |
|                                          |              | hCa <sub>v</sub> 1.1  | CAC1S, L-<br>type calcium<br>channel             | Q13698   |
| <i>Hydra magnipapillata</i>              | Cnidaria     | HmNa <sub>v</sub> 2.1 | -                                                | JQ066819 |
|                                          |              | HmNa <sub>v</sub> 2.5 | -                                                | JQ066820 |
| <i>Loligo bleekeri</i> (squid)           | Mollusca     | Lb Na <sub>v</sub> 2  | -                                                | BAA03398 |
| <i>Loligo opalescens</i><br>(squid)      | Mollusca     | LbNa <sub>v</sub> 2   | -                                                | AAA16202 |
| <i>Mnemiopsis leidyi</i><br>(comb jelly) | Ctenophora   | MINa <sub>v</sub> 2a  | -                                                | AEF59085 |
|                                          |              | MINa <sub>v</sub> 2b  | -                                                | AEF59086 |
| <i>Monosiga brevicollis</i>              | Opisthokonta | MbNa <sub>v</sub> 2   |                                                  | HQ877454 |
| <i>Mus musculus</i> (mouse)              | Chordata     | Nax                   | NaG, SCN6A,<br>SCN7A                             | AAA66192 |
| <i>Nematostella vectensis</i>            | Cnidaria     | NvNa <sub>v</sub> 2.1 | -                                                | HQ877457 |

|                                                          |                 |                       |                                                 |                                           |
|----------------------------------------------------------|-----------------|-----------------------|-------------------------------------------------|-------------------------------------------|
| (starlet sea anemone)                                    |                 | NvNa <sub>v</sub> 2.2 | -                                               | HQ877458                                  |
|                                                          |                 | NvNa <sub>v</sub> 2.3 | -                                               | HQ877459                                  |
|                                                          |                 | NvNa <sub>v</sub> 2.4 | -                                               | HQ877460                                  |
|                                                          |                 | NvNa <sub>v</sub> 2.5 | -                                               | HQ877461                                  |
|                                                          |                 | NvCa <sub>v</sub> 1   | -                                               | XP_001639054                              |
| <i>Polyorchis penicillatus</i><br>(hydrozoan jellyfish)  | Cnidaria        | PpNa <sub>v</sub> 2.5 | -                                               | AAC38974                                  |
| <i>Rattus norvegicus</i> (rat)                           | Chordata        | rNa <sub>v</sub> 1.4  | SCN4A,<br>Skeletal<br>muscle type IV<br>channel | P15390                                    |
|                                                          |                 | rCa <sub>v</sub> 1.2  | CAC1S, L-<br>type calcium<br>channel            | P22002                                    |
| <i>Strongylocentrotus purpuratus</i> (purple sea urchin) | Echinodermata   | SpuNa <sub>v</sub> 2  | -                                               | XP_001189610                              |
| <i>Stylophora pistillata</i><br>(stony coral)            | Cnidaria        | SpiCa <sub>v</sub> 1  | -                                               | AAD11470                                  |
| <i>Thalassiosira pseudonana</i> (diatom)                 | Bacillariophyta | TpCa <sub>v</sub>     | -                                               | XP_002289136                              |
| <i>Thecamonas trahens</i>                                | Apusozoa        | TtNa <sub>v</sub> 2   | TtrNa <sub>v</sub>                              | None, Broad<br>Institute protein<br>model |
| <i>Trichoplax adhaerens</i>                              | Placozoa        | TaNa <sub>v</sub> 2a  | -                                               | HQ877452                                  |
| <i>Trichoplax adhaerens</i>                              | Placozoa        | TaNa <sub>v</sub> 2b  | -                                               | HQ877453                                  |
| <i>Varroa destructor</i>                                 | Arthropoda      | VdNa <sub>v</sub> 1   | -                                               | AAP13992                                  |

**Table S1.** Ion channels used in the phylogenetic analysis. Most channels are derived from cloned transcripts that were deposited in Genbank. Channel transcripts cloned in the present study appear on gray background. Channel obtained from public genome sequencing projects supported by EST data appear in red. The channel protein models of the annelid *Capitella teleta* are from the genome sequencing project performed by the Joint Genome Institute (JGI) available at <http://genome.jgi.doe.gov/Capca1/Capca1.home.html>. The

channel protein model of *Thecamonas trahens* is from the Origins of Multicellularity project by the Broad Institute available at [http://broadinstitute.org/annotation/genome/multicellularity\\_project](http://broadinstitute.org/annotation/genome/multicellularity_project).
